# Supplementary material for: Promoter-Bound p300 Complexes Facilitate Post-Mitotic Transmission of Transcriptional Memory
Source: PubMed Central journal article supplement (PMC4063784; doi:10.1371/journal.pone.0099989), 2014-06-19
Supplement: pone.0099989.s006.pdf [file pone.0099989.s006.pdf]

# Jurkat T-cells

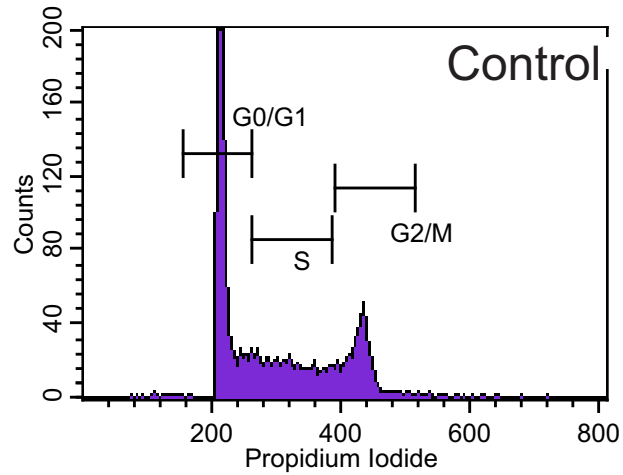

| Marker | % Gated | Mean   |
|--------|---------|--------|
| All    | 100.00  | 281.71 |
| G0/G1  | 57.53   | 218.74 |
| S      | 23.43   | 319.09 |
| G2/M   | 17.90   | 426.10 |

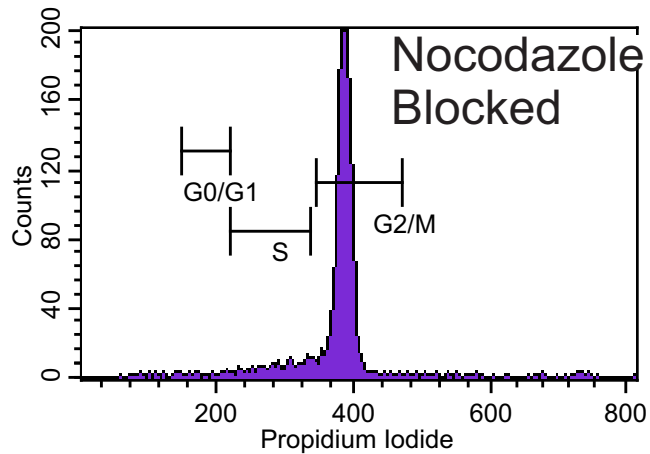

| Marker | % Gated | Mean   |
|--------|---------|--------|
| All    | 100.00  | 375.37 |
| G0/G1  | 0.94    | 188.06 |
| S      | 7.81    | 292.63 |
| G2/M   | 88.15   | 383.65 |

**Supplementary Figure S6. Nocodazole produces highly enriched populations of cells in M-phase.** FACS analysis of Jurkat cells treated with nocodazole (400 ng/ml) for 24 h to obtain metaphase (M-phase) population.
