# Supplementary material for: Promoter-Bound p300 Complexes Facilitate Post-Mitotic Transmission of Transcriptional Memory
Source: PubMed Central journal article supplement (PMC4063784; doi:10.1371/journal.pone.0099989), 2014-06-19
Supplement: pone.0099989.s007.pdf [file pone.0099989.s007.pdf]

**A**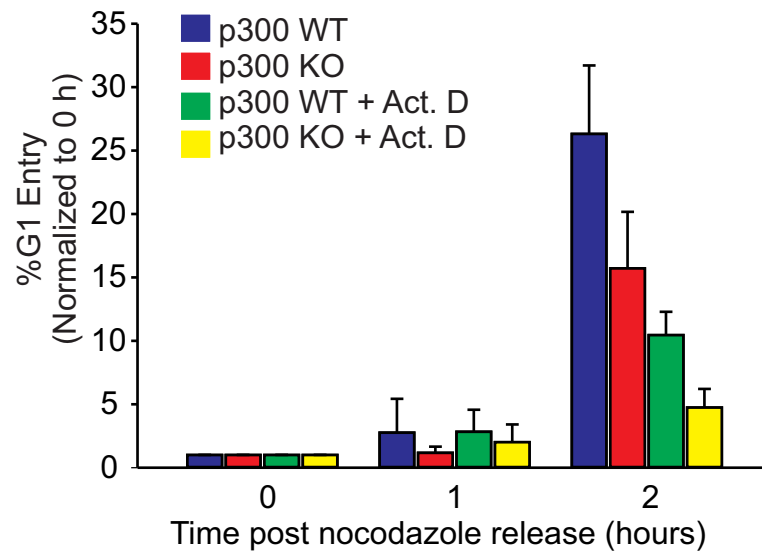**B**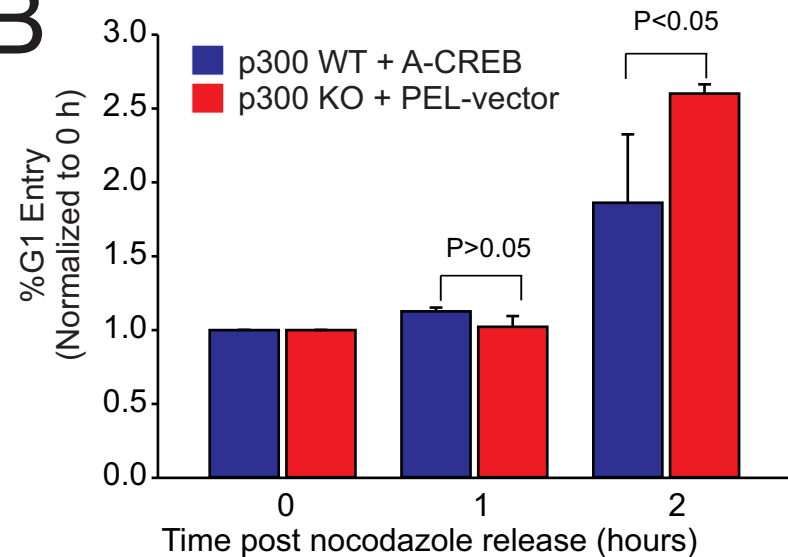

**Supplementary Figure S7. Both p300 depleted and CREB inhibited cells show delayed entry into G1.** p300 WT and p300 KO cells were treated as in Figure 3B. A graphical representation of G1 cells analyzed by FACS comparing p300 WT and p300 KO cells (A) in the presence of the transcriptional inhibitor actinomycin D or (B) cells expressing dominant negative CREB upon nocodazole treatment and released.
