# Supplementary material for: Promoter-Bound p300 Complexes Facilitate Post-Mitotic Transmission of Transcriptional Memory
Source: PubMed Central journal article supplement (PMC4063784; doi:10.1371/journal.pone.0099989), 2014-06-19
Supplement: pone.0099989.s008.pdf [file pone.0099989.s008.pdf]

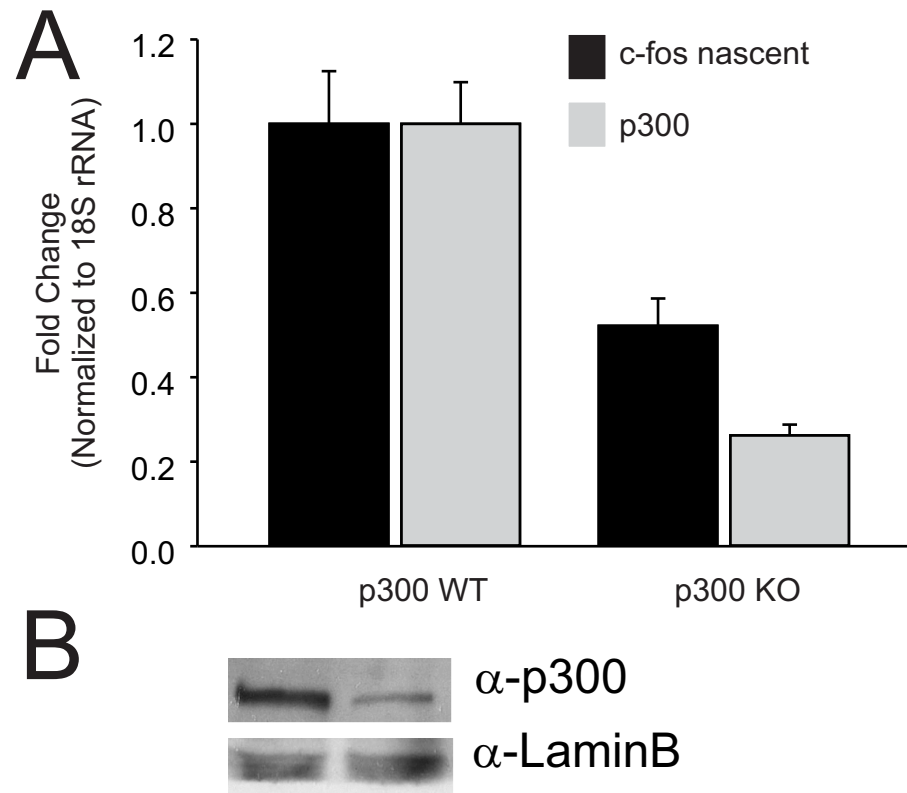

**Supplementary Figure S8. Confirmation of p300 depletion in HEK293 cells.** (A) qRT-PCR profile showing expression of *FOS* and p300 respectively of p300 WT and p300 KO in HEK293 cell. (B) Western blot showing protein level of p300 and LaminB as loading control.
