# Supplementary material for: Promoter-Bound p300 Complexes Facilitate Post-Mitotic Transmission of Transcriptional Memory
Source: PLOS journal article supplement (doi:10.1371/journal.pone.0099989), 2014-06-19
Supplement: S5 (10.1371/journal.pone.0099989.s005) [file journal.pone.0099989.s005]

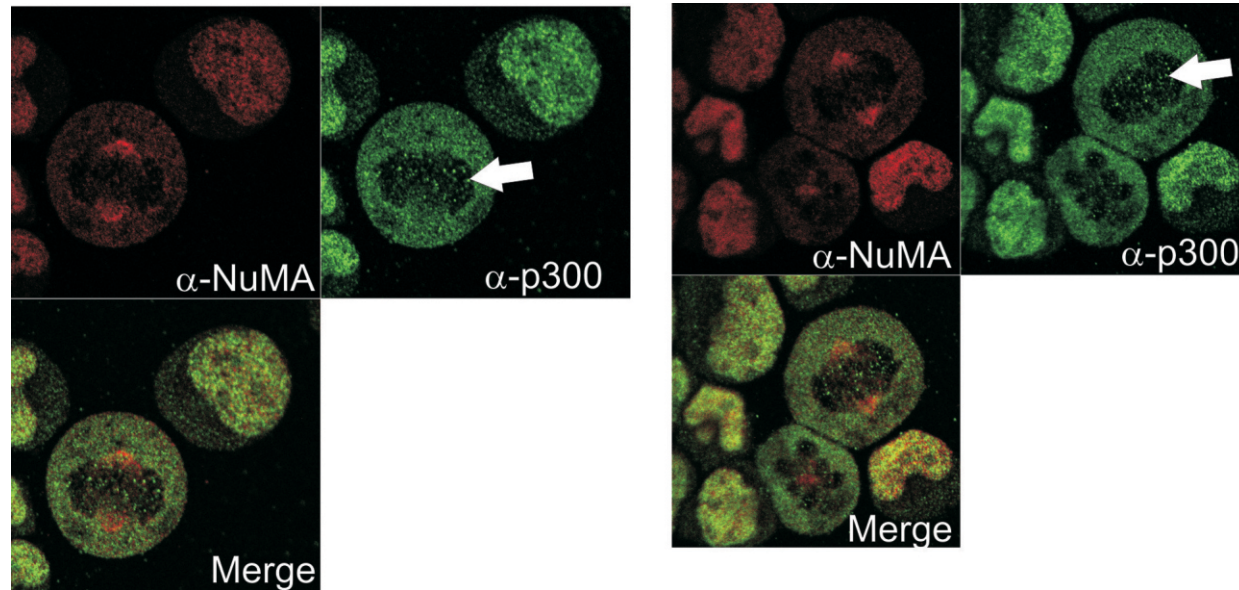

**Supplementary Figure S5. Subpopulations of p300 are retained on mitotic chromatin.** Fixed Jurkat cells were doubly labeled with  $\alpha$ -nuclear mitotic apparatus protein (NuMA) (as detected with Alexa Fluor® 594 anti-mouse antibody, red) and  $\alpha$ -p300 (as detected with Alexa Fluor® 488 anti-rabbit antibody, green) antibodies. The arrow indicates the presence of p300 in chromatin of a mitotic cell.
